# Supplementary material for: BZD9L1 Differentially Regulates Sirtuins in Liver-Derived Cells by Inducing Reactive Oxygen Species
Source: MDPI journal article supplement (doi:10.3390/biomedicines11113059), 2023-11-15
Supplement: s1 [file s1]

## Supplementary Figure

### a) THLE-2

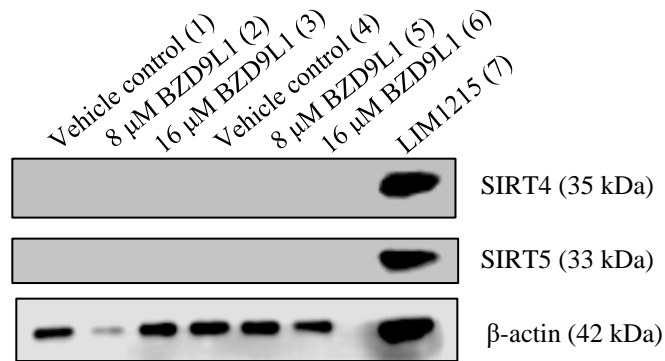

### b) HEK293

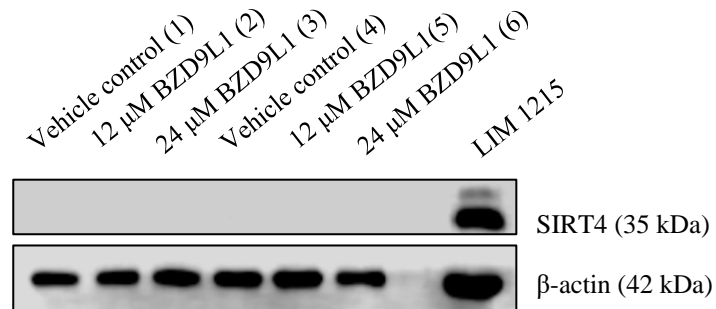

**Supplementary Figure S1.** Representative western blots showing proteins levels of SIRT4 and SIRT5 in THLE-2 and HEK293 cells upon BZD9L1 treatment for 24 h (lane 1–3) and 72 h (lane 4–6),  $n = 3$  independent experiments.  $\beta$ -actin was used as a loading control. LIM1215 colorectal cancer cells were used as a positive control to confirm the validity of the SIRT4 and SIRT5 antibodies.
